# Supplementary material
Source: PubMed Central journal article supplement (PMC1482852)
Supplement: jbacter_188_10_3551__1.pdf [file jbacter_188_10_3551__1.pdf]

**Supplementary Table SI.** 2-DE electrophoretic behavior and MALDI-TOF coverage of

*B. anthracis* secreted proteins identified in this study

| Spot number<br>(accession<br>number) | MW (kDa)<br>(Predicted)<br>Observed | PI<br>(Predicted*)<br>Observed | No. of<br>peptides<br>(% coverage) | Spot number<br>(accession<br>number) | MW (kDa)<br>(Predicted)<br>Observed | PI<br>(Predicted*)<br>Observed | No. of peptides<br>(% coverage) |
|--------------------------------------|-------------------------------------|--------------------------------|------------------------------------|--------------------------------------|-------------------------------------|--------------------------------|---------------------------------|
| 1<br>(BA4539)                        | (65.8)<br>65.8                      | (4.70)<br>4.7                  | 12<br>(36.0)                       | 41<br>(BA2793)                       | (45.3)<br>48                        | (6.20)<br>6.5                  | 9<br>(30.2)                     |
| 2<br>(BA1295)                        | (83.7)<br>82                        | (5.30)<br>5.2                  | 22<br>(35.2)                       | 42<br>(BA1449)                       | (43.4)<br>47                        | (6.27)<br>6.5                  | 6<br>(21.0)                     |
| 3<br>(BA3367)                        | (62.0)<br>65.5                      | (4.80)<br>4.8                  | 15<br>(44.0)                       | 43<br>(BA3162)                       | (55.0)<br>50                        | (6.25)<br>6.5                  | 10<br>(20.8)                    |
| 4<br>(BA0267)                        | (57.4)<br>65                        | (4.80)<br>4.5                  | 19<br>(38.8)                       | 45<br>(pXO1-15)                      | (15.8)<br>15                        | (9.41)<br>9.5                  | 3<br>(35.4)                     |
| 5<br>(BA5364)                        | (46.4)<br>50                        | (4.80)<br>4.5                  | 14<br>(54.0)                       | 46<br>(BA0599)**                     | (58.4)<br>35                        | (5.79)<br>6                    | 7<br>(40.3)                     |
| 6<br>(pXO1-110)                      | (83.4)<br>83                        | (5.80)<br>4-6                  | 22<br>(46.0)                       | 47<br>(BA0887)                       | (88.7)<br>90                        | (5.70)<br>6                    | 15<br>(28.2)                    |
| 7<br>(BA0685)                        | (43.6)<br>55                        | (6.34)<br>6.5                  | 11<br>(38.6)                       | 48<br>(BA3338)                       | (37)<br>35                          | (5.40)<br>5.5                  | 13<br>(43.0)                    |
| 8<br>(BA1191)                        | (59.4)<br>52                        | (6.18)<br>7.5                  | 8<br>(12.5)                        | 49<br>(BA3737)                       | (61.1)<br>65                        | (5.50)<br>6                    | 9<br>(26.5)                     |
| 8<br>(BA0656)                        | (64.0)<br>52                        | (6.84)<br>7.5                  | 8<br>(15.9)                        | 50**<br>(BA0898)                     | (55.5)<br>30                        | (8.40)<br>9.5                  | 8<br>(25.9)                     |
| 9<br>(BA4322)                        | (54.8)<br>58                        | (5.60)<br>5.8                  | 15<br>(39)                         | 51<br>(pXO1-90)                      | (73.0)<br>78                        | (9.01)<br>8                    | 16<br>(45.7)                    |
| 10<br>(BA5470)**                     | (73.5)<br>50                        | (6.50)<br>6.5                  | 7<br>(59.4)                        | 52<br>(pXO1-107)                     | (90.2)<br>90                        | (5.80)<br>7                    | 22<br>(30.6)                    |
| 11<br>(BA3660)                       | (35.3)<br>37                        | (5.50)<br>6                    | 14<br>(47.0)                       | 53<br>(BA1436)**                     | (72.2)<br>58                        | (7.60)<br>7                    | 4<br>(22.0)                     |
| 17<br>(BA3588)                       | (29.5)<br>44.8                      | (6.02)<br>6.5                  | 6<br>(33.0)                        | 54***<br>(BA1075)                    | (64.0)<br>90                        | (5.42)<br>6                    | 10<br>(41.5)                    |
| 18<br>(BA3189)                       | (32.6)<br>35                        | (5.62)<br>6                    | 9<br>(44.3)                        | 55<br>(BA2283)                       | (71.0)<br>60                        | (6.30)<br>5.5                  | 7<br>(14.2)                     |
| 19<br>(BA0885)                       | (83.8)<br>85                        | (6.20)<br>7                    | 17<br>(34.1)                       | 56<br>(BA0796)                       | (38.3)<br>38                        | (8.66)<br>9                    | 5<br>(23.5)                     |
| 20<br>(BA1197)                       | (60.0)<br>60                        | (6.01)<br>6                    | 21<br>(39.1)                       | 57<br>(BA4346)                       | (82.6)<br>82                        | (5.19)<br>5                    | 12<br>(30.8)                    |
| 21***<br>(BA1290)                    | (19)<br>27                          | (4.61)<br>4.5                  | 4<br>(34.2)                        | 58<br>(BA2460)                       | (50.6)<br>50                        | (6.30)<br>6.5                  | 6<br>(13.9)                     |
| 22**<br>(BA0703)                     | (30.6)<br>27                        | (6.41)<br>6.5                  | 8<br>(41.2)                        | 59<br>(BA5427)                       | (45.0)<br>47.7                      | (6.48)<br>7                    | 13<br>(40.0)                    |
| 23<br>(BA0228)                       | (72.7)<br>75                        | (5.75)<br>6                    | 6<br>(22.2)                        | 60<br>(pXO1-122)                     | (89.3)<br>87                        | (6.80)<br>5.5                  | 11<br>(20.9)                    |
| 27<br>(NT05BA5430)                   | (65.7)<br>69                        | (5.36)<br>5.5                  | 12<br>(29)                         | 61<br>(BA0307)                       | (42.8)<br>45                        | (5.90)<br>6.5                  | 11<br>(36.0)                    |
| 28<br>(BA0908)                       | (57.5)<br>56                        | (6)<br>6.5                     | 13<br>(37.1)                       | 62<br>(BA2673)                       | (47.9)<br>50                        | (8.73)<br>9.5                  | 19<br>(40.3)                    |
| 29<br>(BA2947)**                     | (70.8)<br>50                        | (6.50)<br>7                    | 11<br>(56.0)                       | 63<br>(BA3854)                       | (36.5)<br>40                        | (6.41)<br>8                    | 12<br>(50.2)                    |
| 30<br>(BA0855)                       | (26.9)<br>30                        | (7.19)<br>8                    | 7<br>(41.6)                        | 64<br>(BA5696)                       | (24.0)<br>25                        | (5.70)<br>6                    | 6<br>(45.0)                     |
| 31<br>(BA4750)                       | (27.2)<br>30                        | (6.93)<br>7.5                  | 7<br>(43.6)                        | 65<br>(BA5220)                       | (27.9)<br>30                        | (6.20)<br>6.5                  | 11<br>(47.0)                    |
| 32<br>(BA2230)                       | (18.6)<br>18.5                      | (5.11)<br>5.1                  | 8<br>(85.8)                        | 66<br>(BA2827)                       | (20.5)<br>20                        | (7.52)<br>9                    | 5<br>(28.3)                     |
| 33<br>(BA3346)                       | (44.9)<br>47                        | (5.46)<br>5.5                  | 5<br>(16.9)                        | 67<br>(BA0345)                       | (20.7)<br>25                        | (4.91)<br>5                    | 7<br>(47.0)                     |
| 34<br>(BA2944)                       | (26.8)<br>30.7                      | (6.36)<br>6.4                  | 10<br>(48.7)                       | 68<br>(BA4705)                       | (47.2)<br>44                        | (4.60)<br>5                    | 4<br>(23.3)                     |
| 36<br>(BA0165)                       | (74.5)<br>70                        | (5.22)<br>4.5                  | 4<br>(12.6)                        | 69<br>(BA3645)                       | (61.1)<br>61                        | (6.10)<br>6.5                  | 8<br>(22.2)                     |
| 37<br>(BA3560)                       | (33.1)<br>40                        | (8.48)<br>9                    | 6<br>(22.1)                        | 70<br>(BA4387)                       | (39.9)<br>40                        | (5.30)<br>6                    | 6<br>(24.0)                     |
| 38<br>(BA1952)                       | (41.5)<br>40                        | (9.67)<br>10                   | 6<br>(24.1)                        | 71<br>(BA4873)                       | (40.1)<br>40                        | (5.35)<br>6                    | 12<br>(48.0)                    |
| 39<br>(BA0799)                       | (37.0)<br>45                        | (5.95)<br>7                    | 11<br>(45.7)                       | 72<br>(BA5249)                       | (85.5)<br>85                        | (6.91)<br>6.5                  | 7<br>(11.4)                     |
| 40<br>(BA0331)                       | (39.7)<br>38                        | (6.54)<br>6.5                  | 10<br>(38.3)                       | 73<br>(pXO1-130)                     | (27.7)<br>23                        | (6.12)<br>6.5                  | 6<br>(42.6)                     |

Notes to Supplementary Table SI:

\*The calculated masses of putative export signal peptides were removed from the values of the predicted masses.

\*\*Six proteins (spots: 10, 22, 29, 46, 50, 53) detected in the secretome represent proteolytically processed forms of lower mass. The domains retained in the processed forms were identified in the MALDI-TOF spectra. See text for details.

\*\*\*Proteins BA1290 (spot 21) and BA1075 (spot 54) exhibit an observed mass significantly higher than predicted, indicative of possible post-translation modifications.
