# Supplementary material
Source: PubMed Central journal article supplement (PMC1482852)
Supplement: jbacter_188_10_3551__2.pdf [file jbacter_188_10_3551__2.pdf]

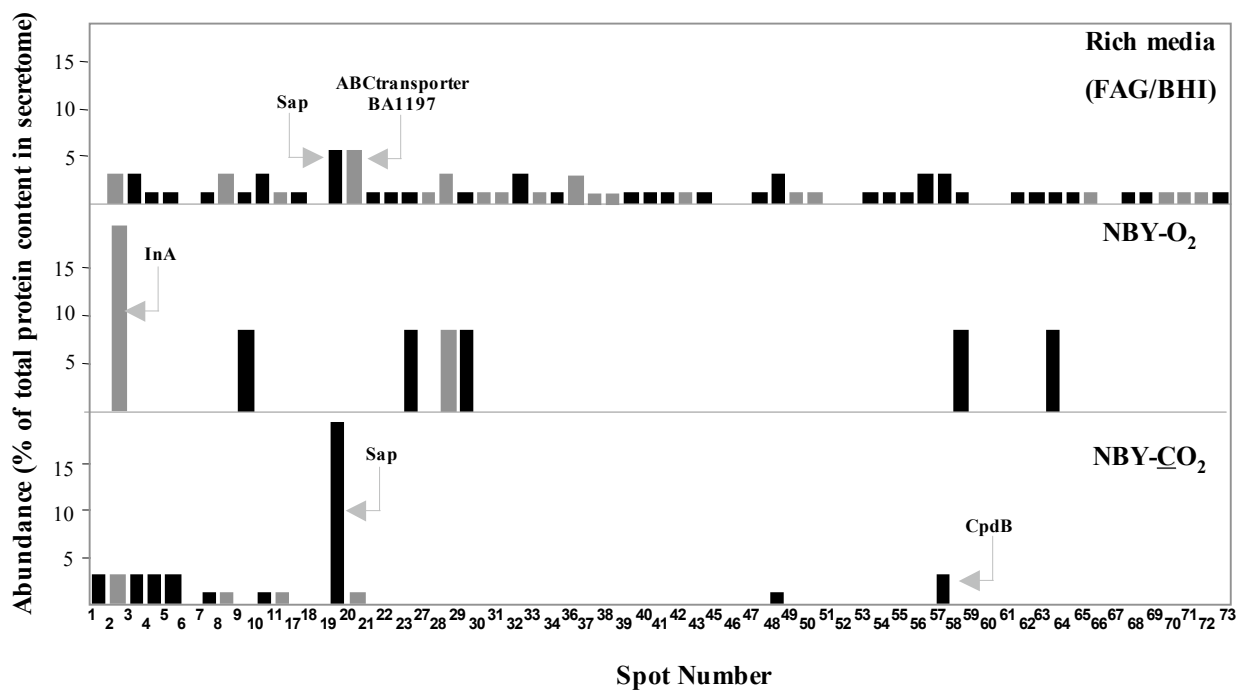

**Supplementary Figure S1. Relative abundance of *B. anthracis*  $\Delta 14185$  proteins in various secretomes.**

The values represent the averaged abundance ( $\pm 10\%$ ) obtained for individual spots identified in at least three 2-DE duplicate gels representing each protein signature, which were scanned and analyzed using the PDQuest software. Absence of spots indicates an abundance lower than 0.1% of the total protein mass. Equivalent amounts (100  $\mu\text{g}$ ) of protein were loaded on each gel. Grey columns represent proteins possessing biological activities associated with utilization of proteins such as proteases and transporters involved in amino-acid and peptide import.
